# Supplementary material for: Visualizing chemical structure-subcellular localization relationships using fluorescent small molecules as probes of cellular transport
Source: PubMed Central journal article supplement (PMC3852740; doi:10.1186/1758-2946-5-44), 2013-10-05
Supplement: 1758-2946-5-44-S1.pdf [file 1758-2946-5-44-S1.pdf]

# SUPPLEMENTARY MATERIALS

**Visualizing Chemical Structure-Subcellular Localization Relationships Using  
Fluorescent Small Molecules as Probes of Cellular Transport**

Gus R. Rosania<sup>1\*</sup>, Kerby Shedden<sup>2</sup>, Nan Zheng<sup>1#</sup> and Xinyuan Zhang<sup>1#</sup>

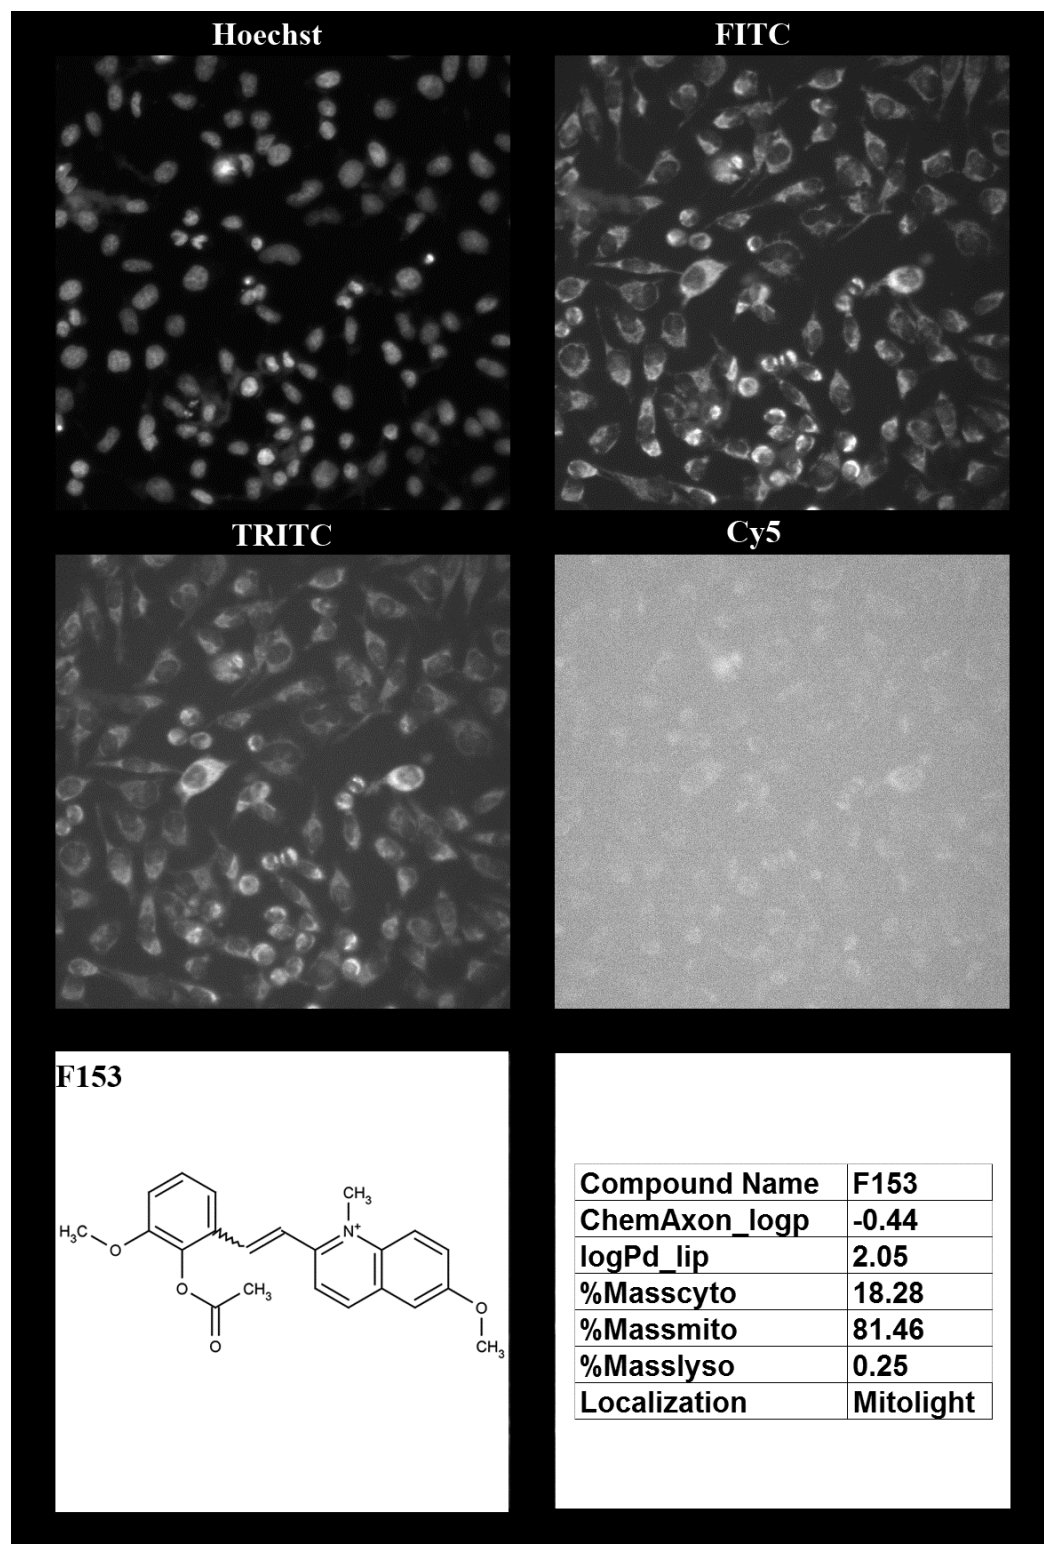

Figures S1. Compound 1 (from Figure 3).

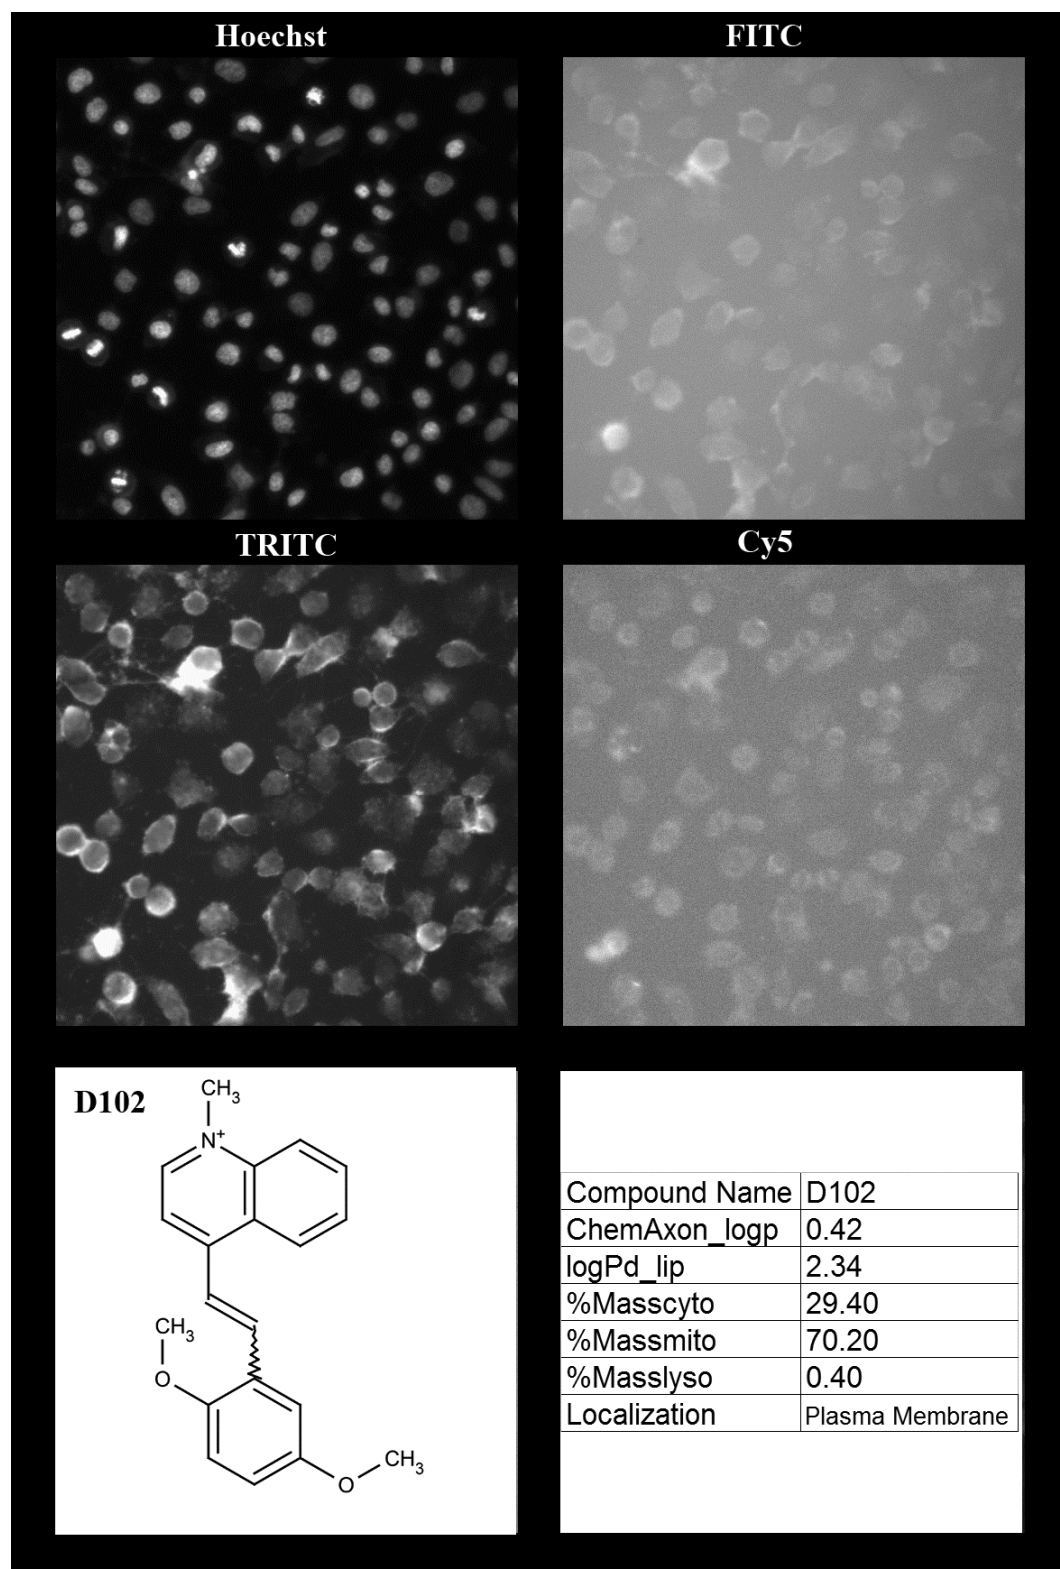

Figure S2. Compound 2 from figure 3.

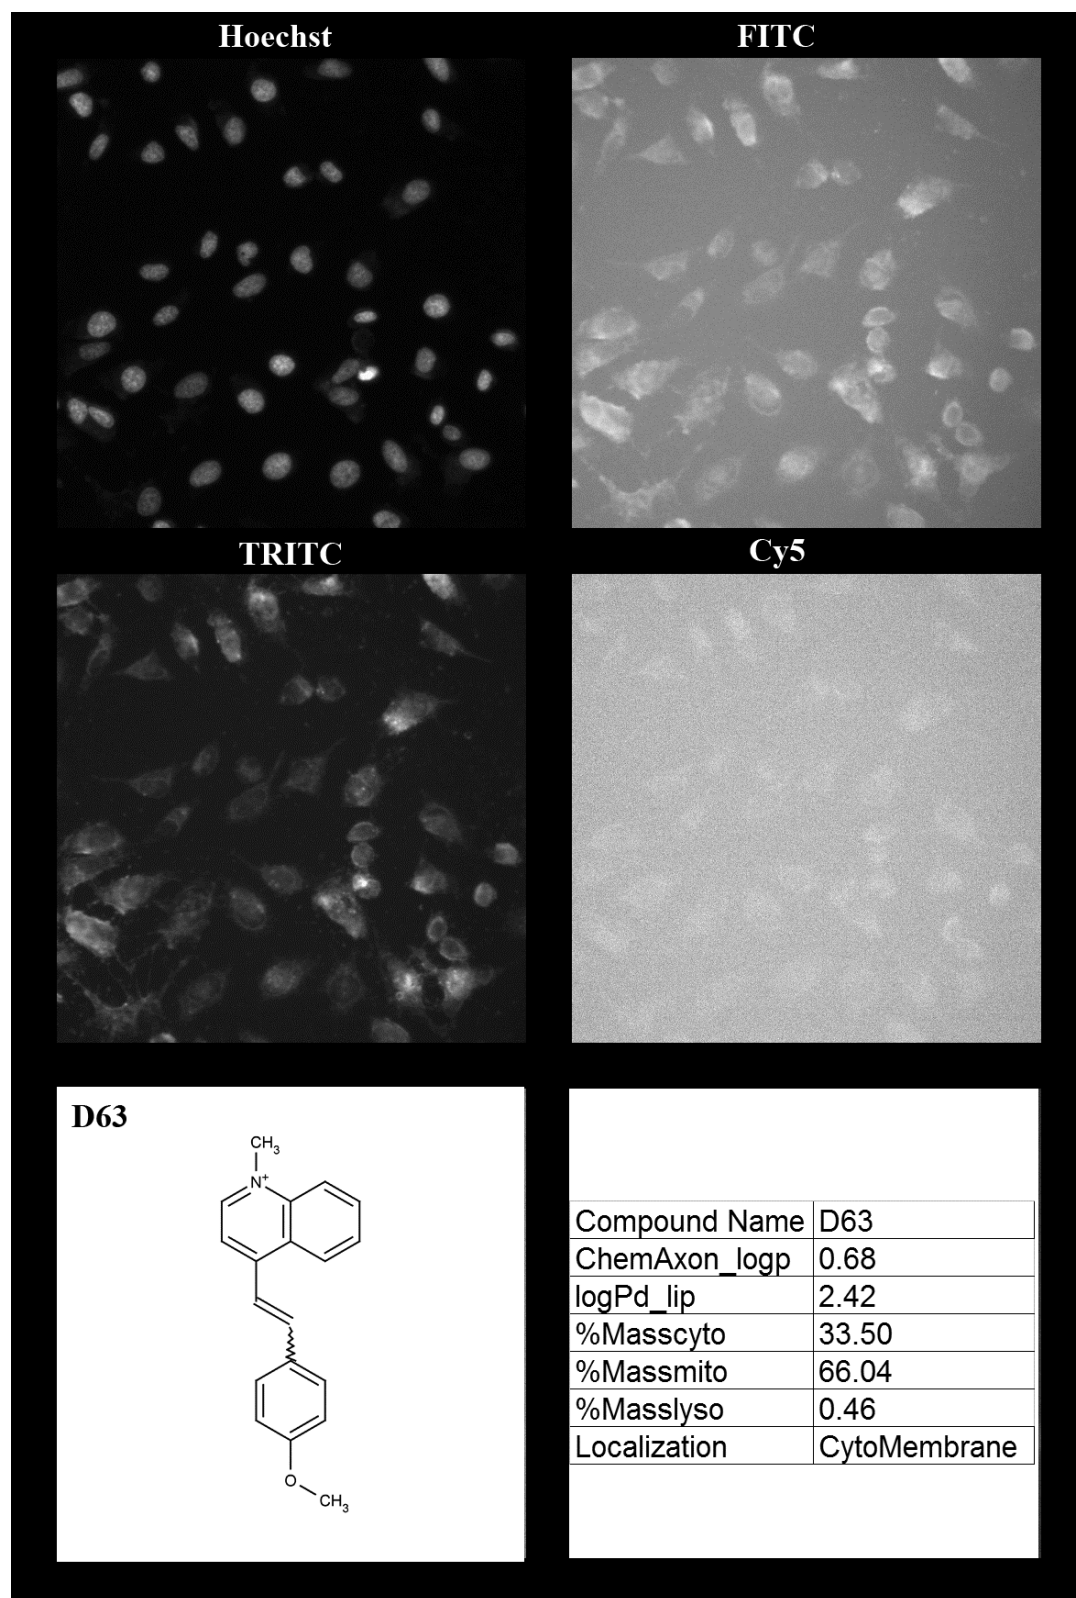

Figure S3. Compound 3 from Figure 3.

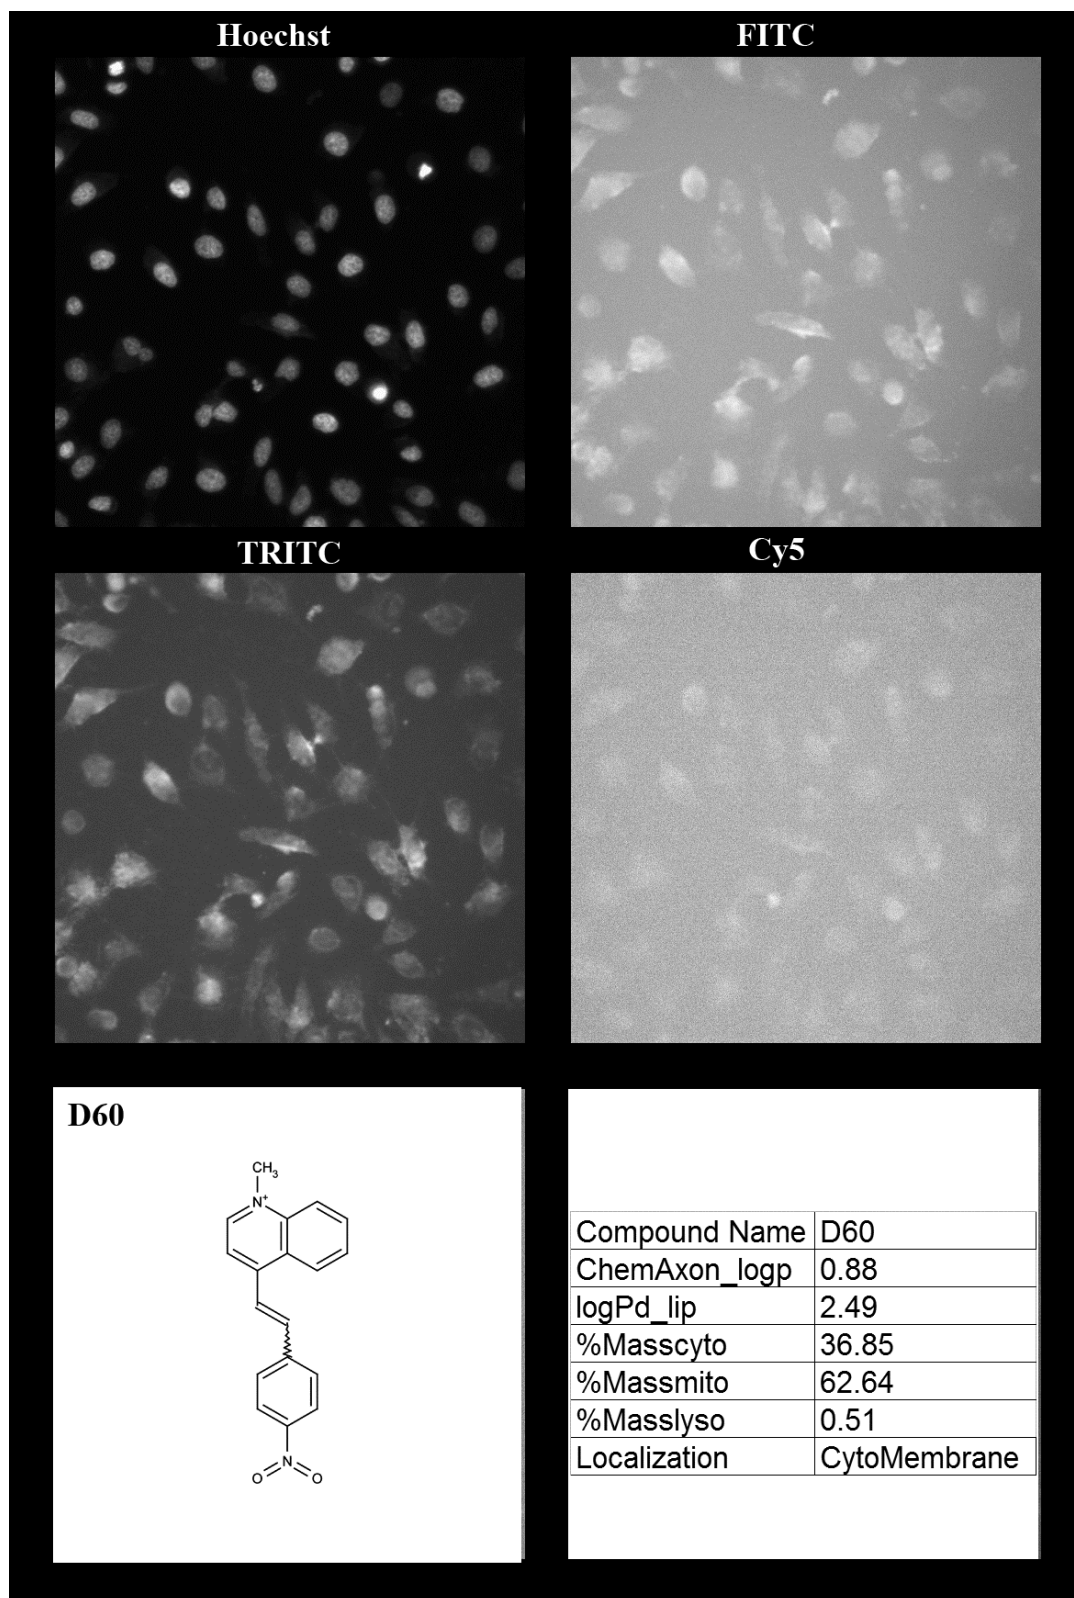

Figure S4: Compound 4 from figure 3.

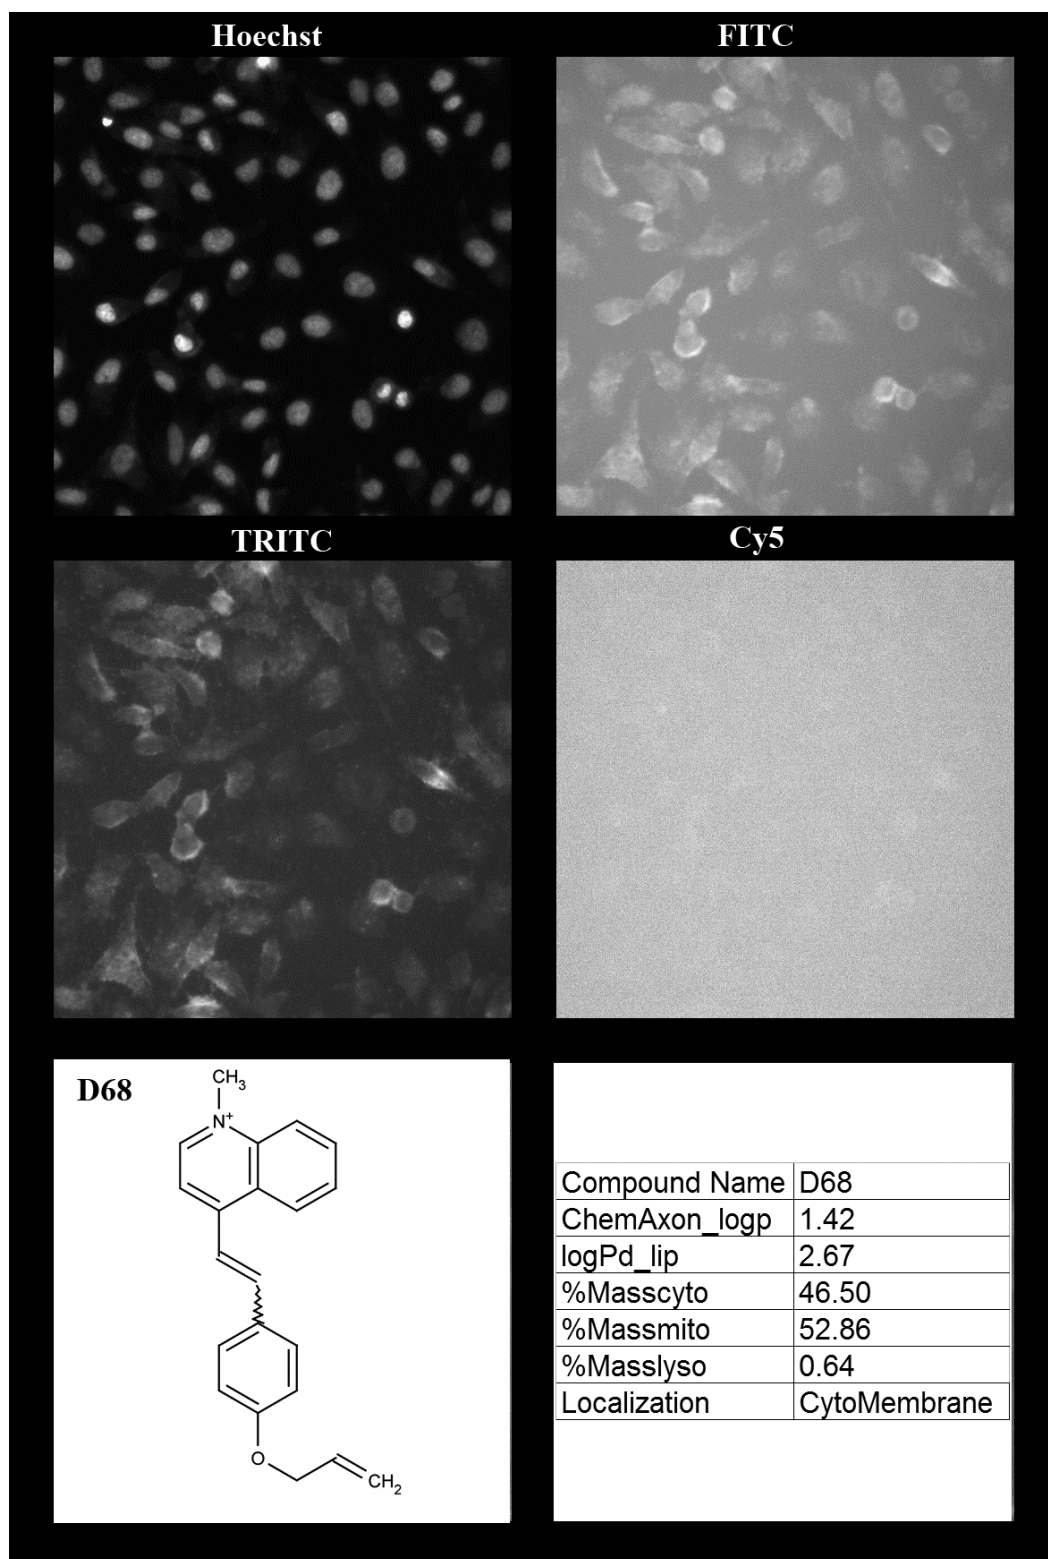

Figure S5. Compound 5 from figure 3.

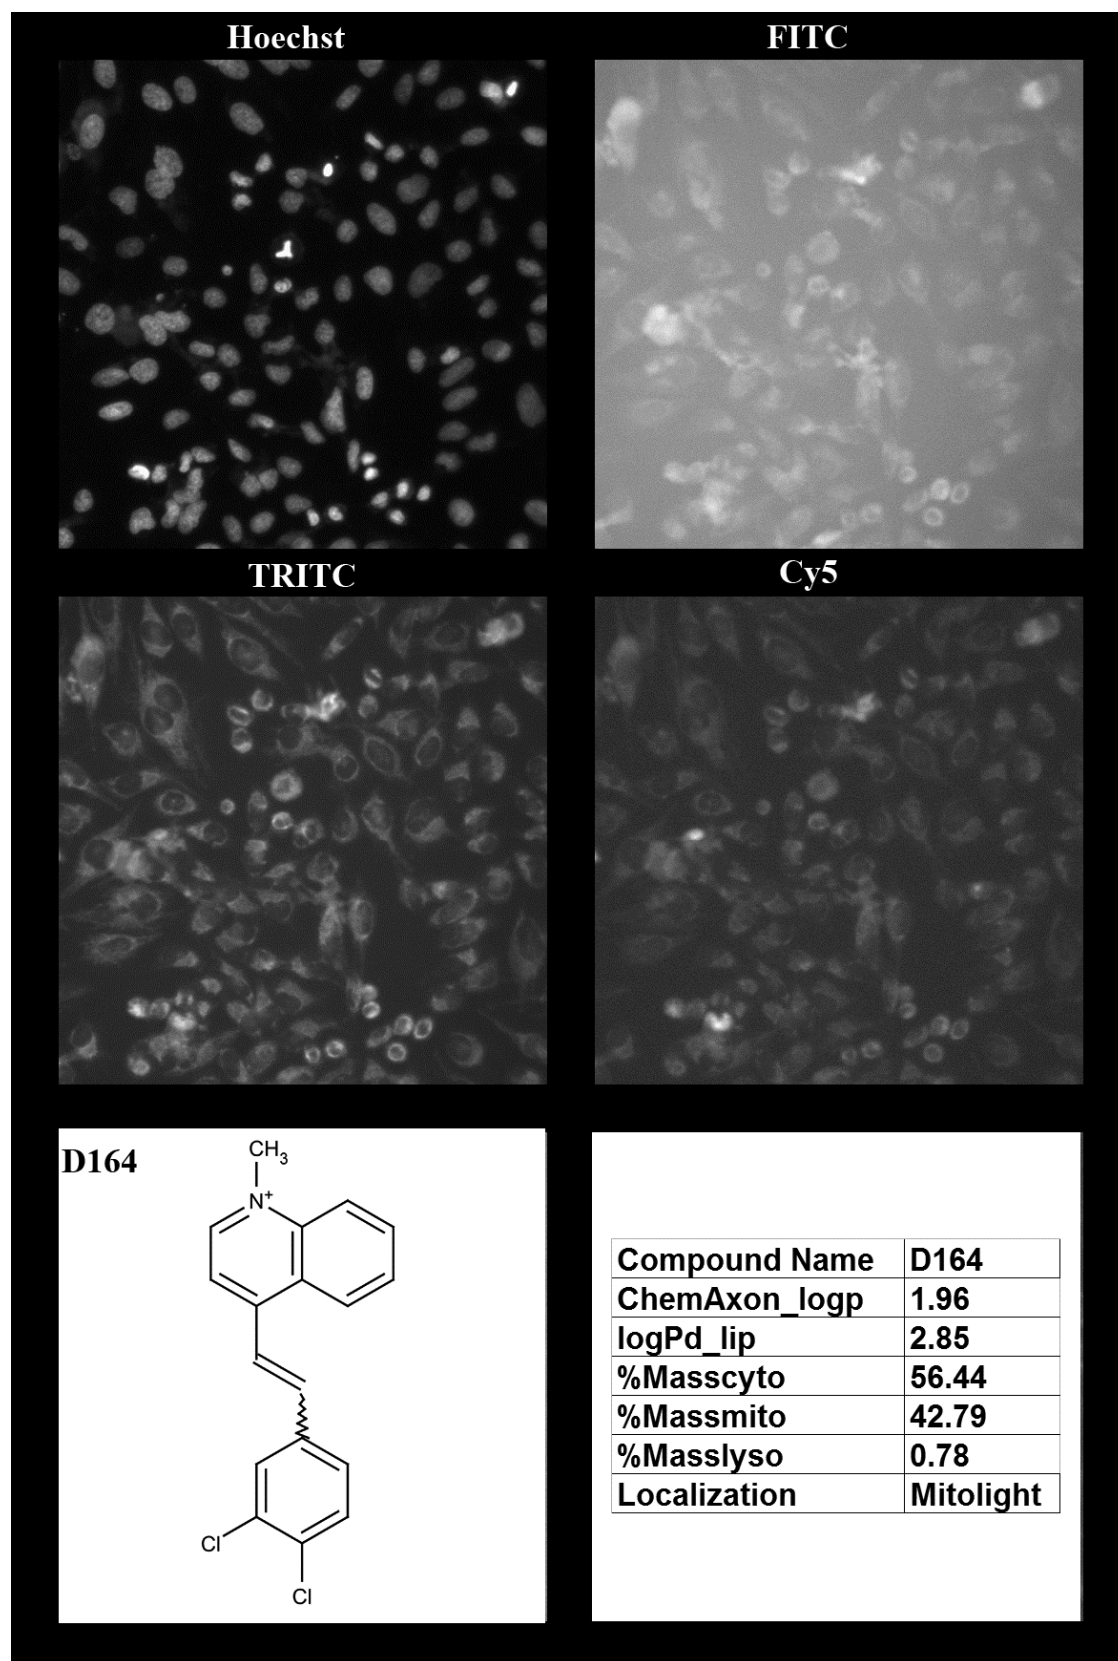

Figure S6. Compound 6 from figure 3.

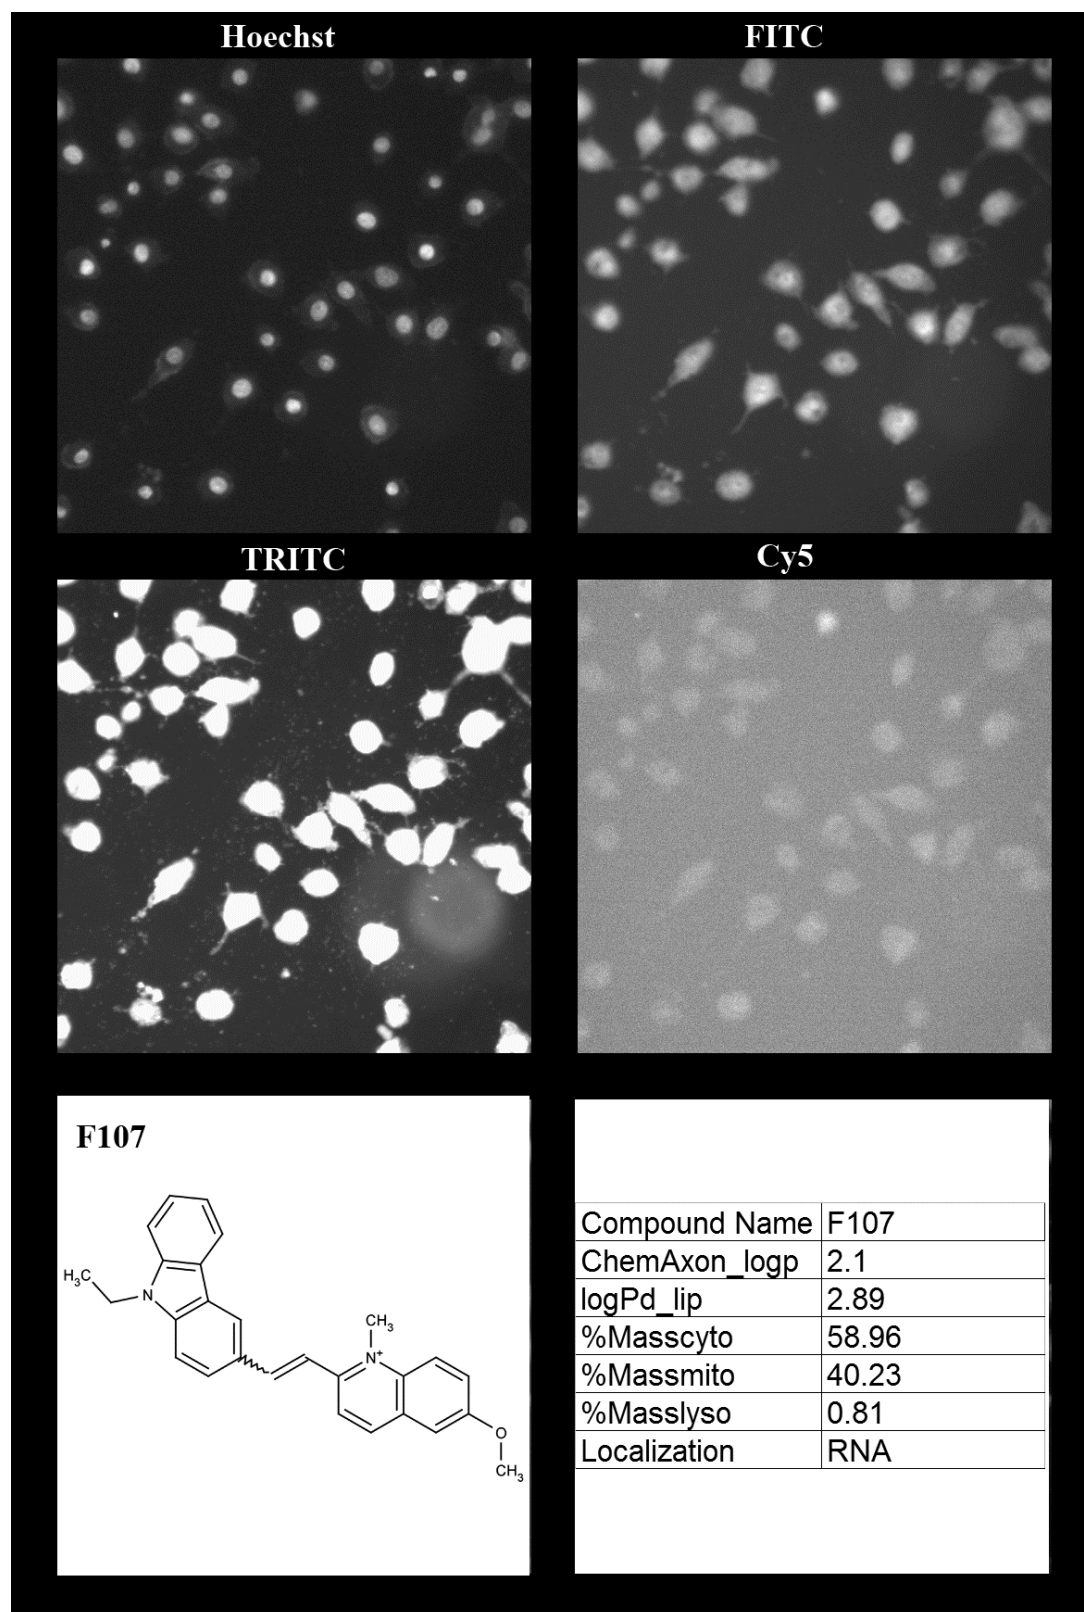

Figure S7. Compound 7 from figure 3.



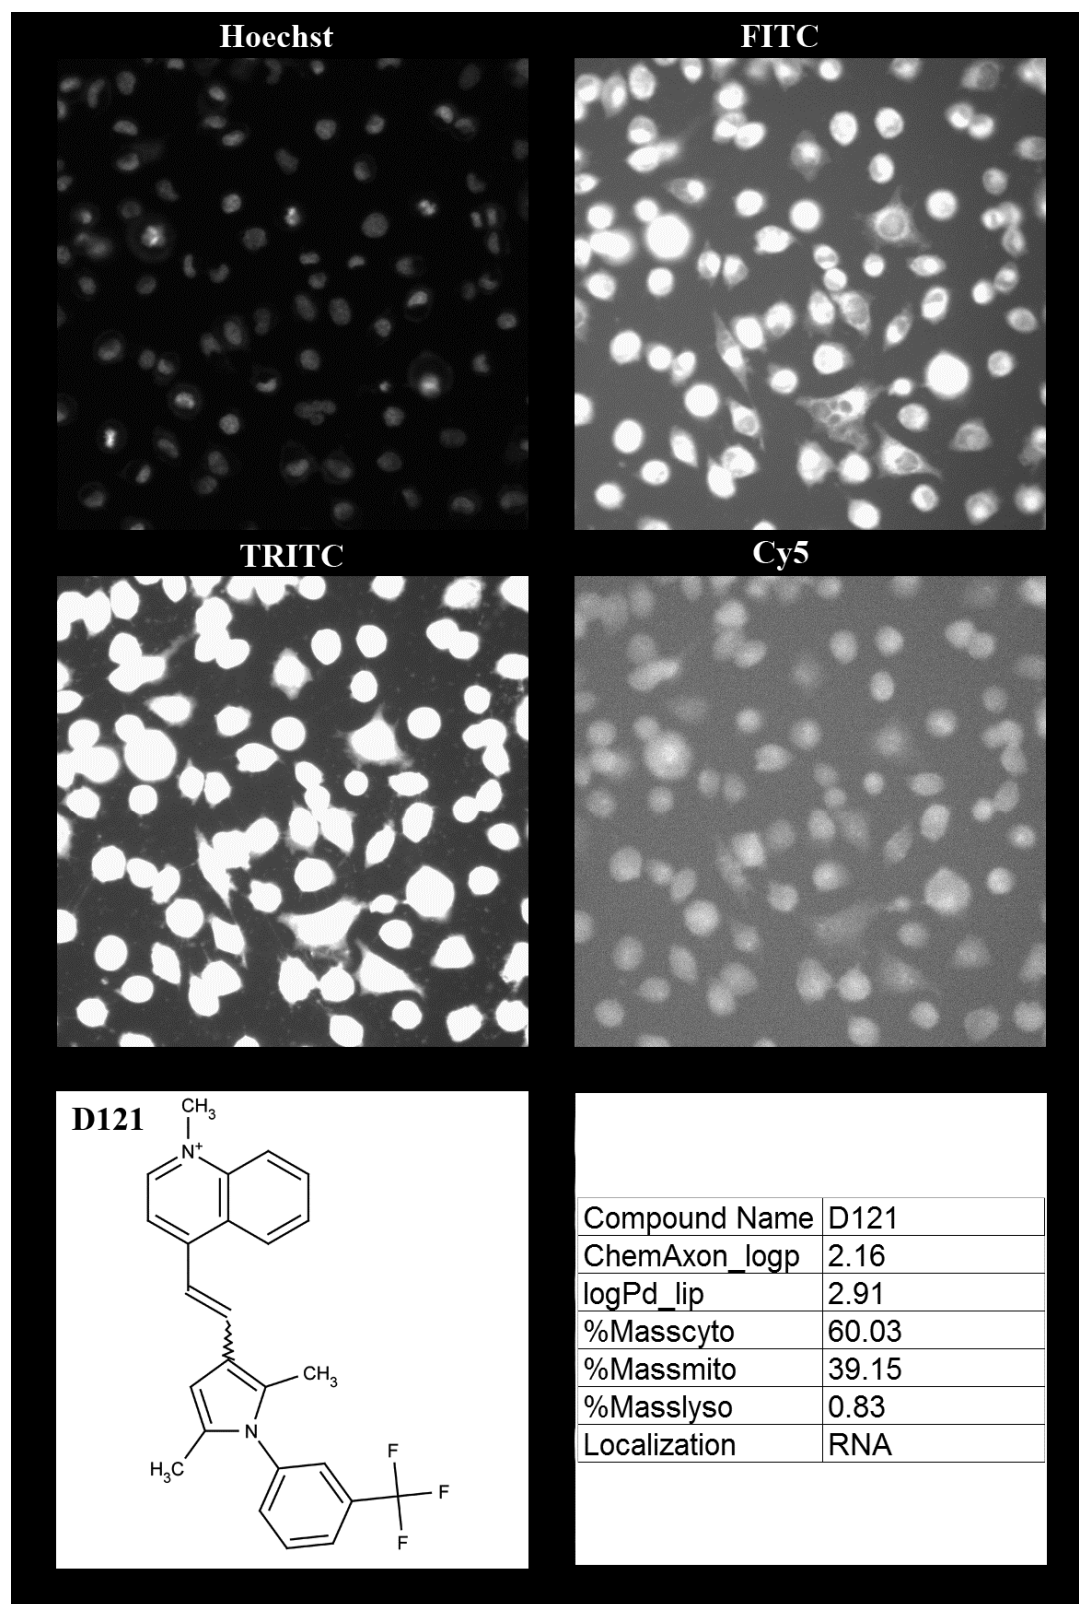

Figure S8. Compound 8 from figure 3.

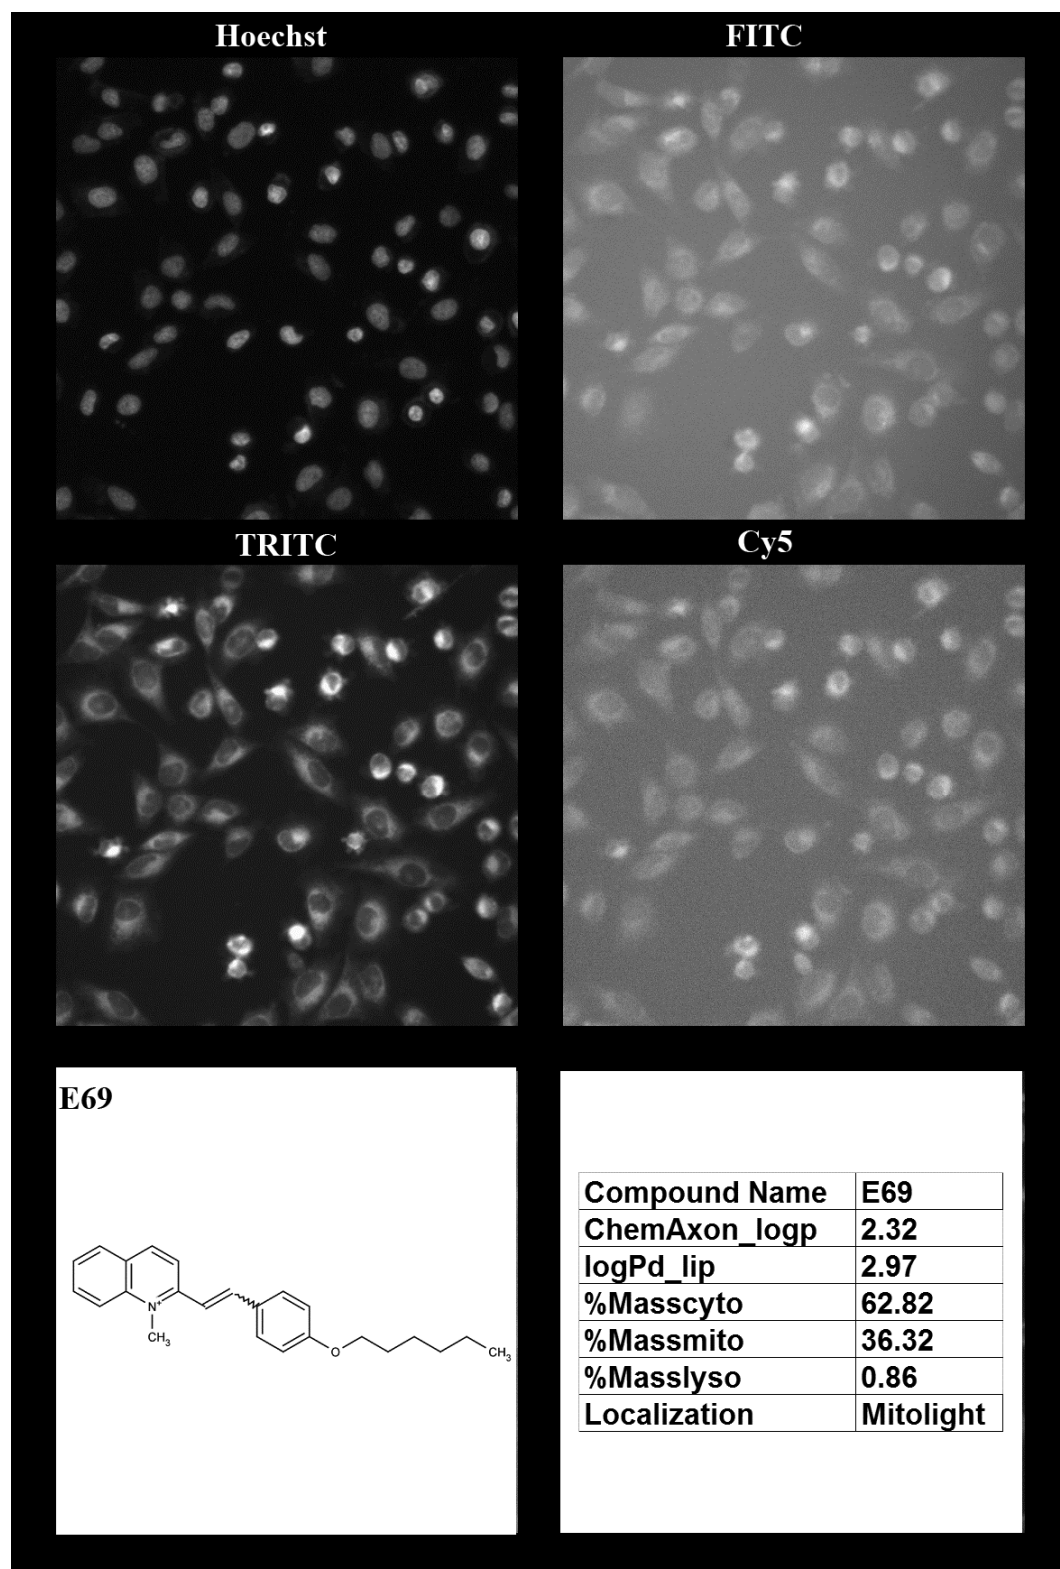

Figure S9. Compound 9 from figure 3.

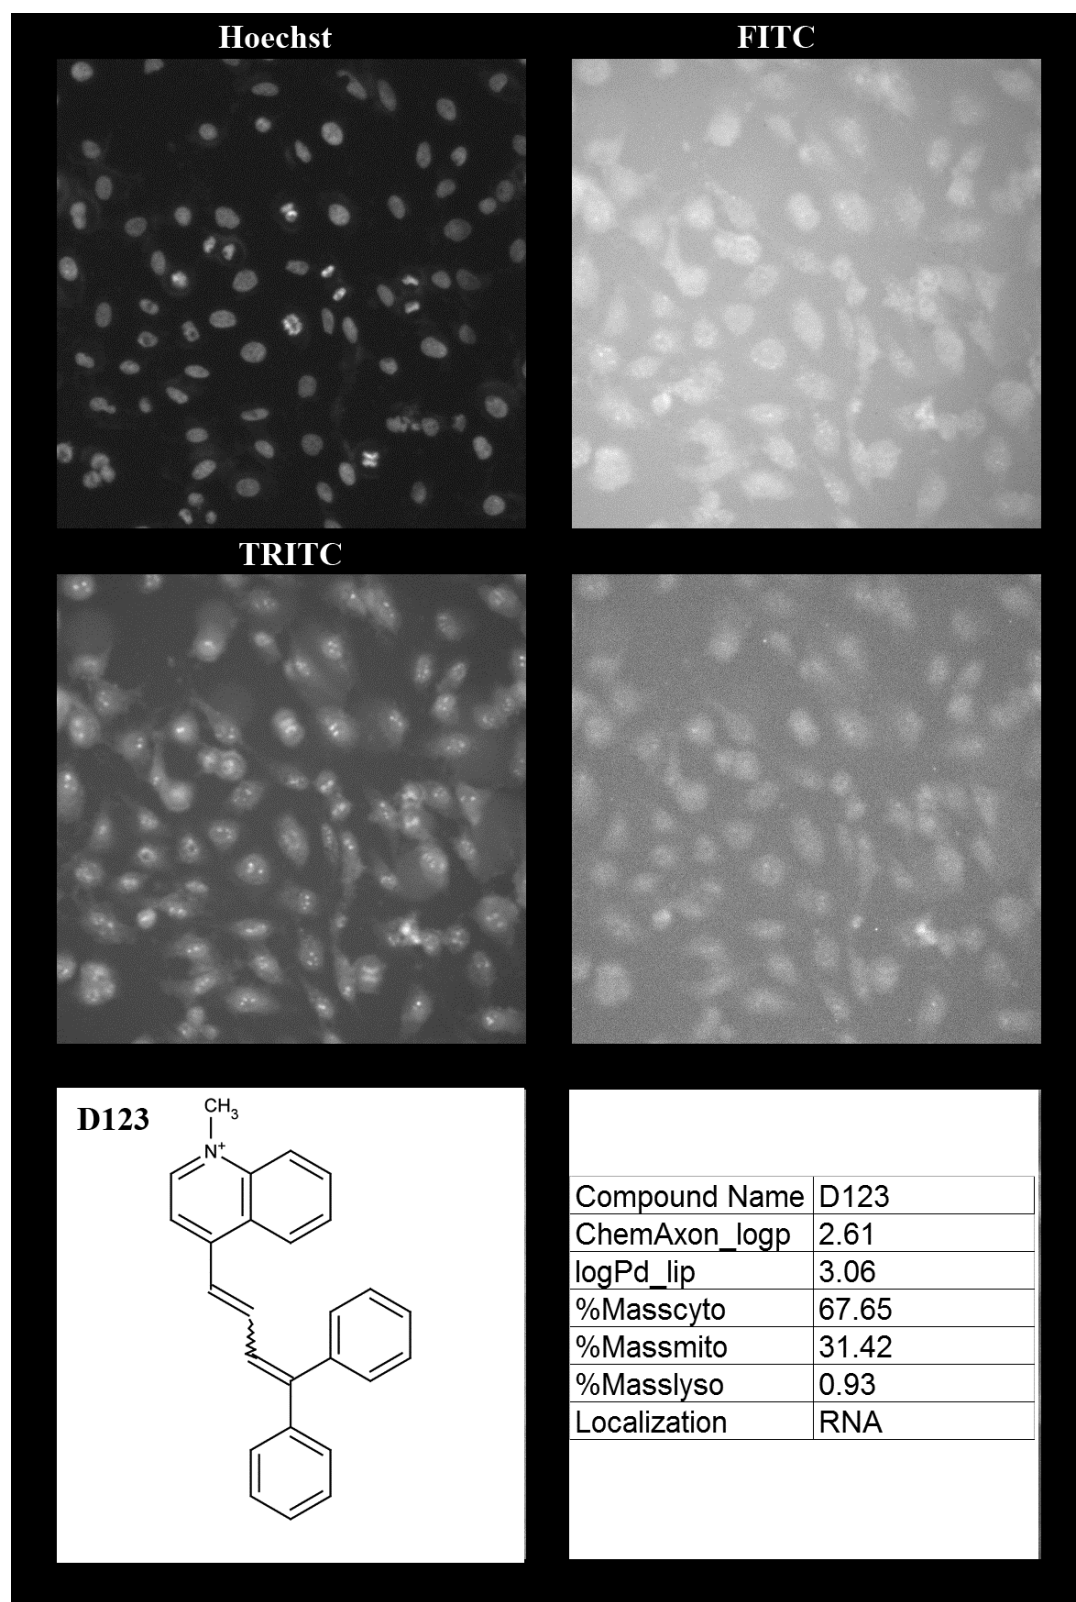

Figure S10. Compound 10 from figure 3.

**Hoechst**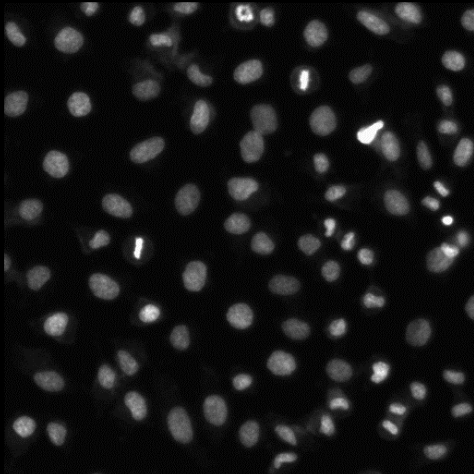**FITC**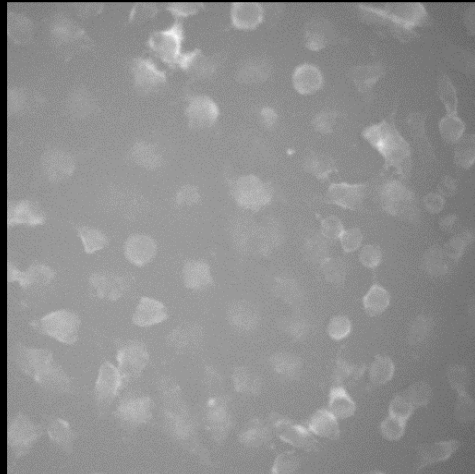**TRITC**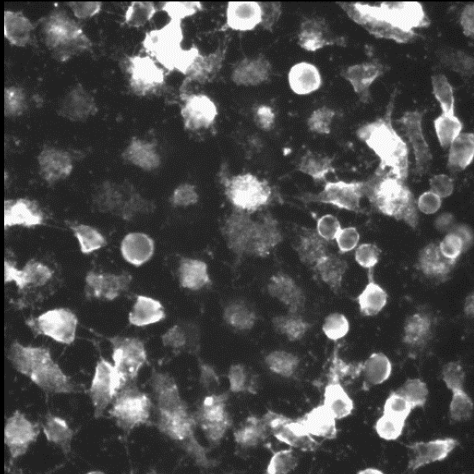**Cy5**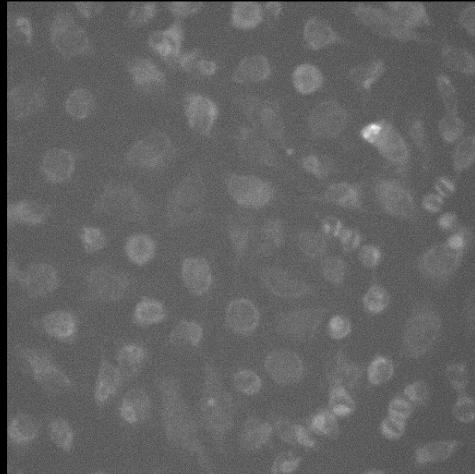**D101**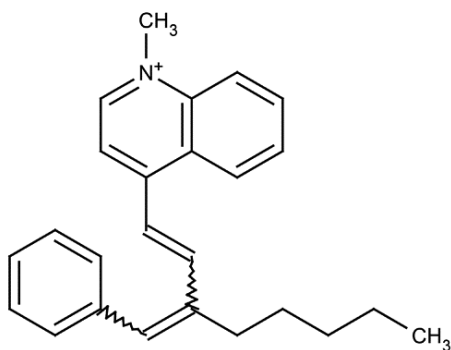

|               |                 |
|---------------|-----------------|
| Compound Name | D101            |
| ChemAxon_logp | 3.2             |
| logPd_lip     | 3.26            |
| %Masscyto     | 76.27           |
| %Massmito     | 22.68           |
| %Masslyso     | 1.05            |
| Localization  | Plasma Membrane |

Figure S11. Compound 11 from figure 3.

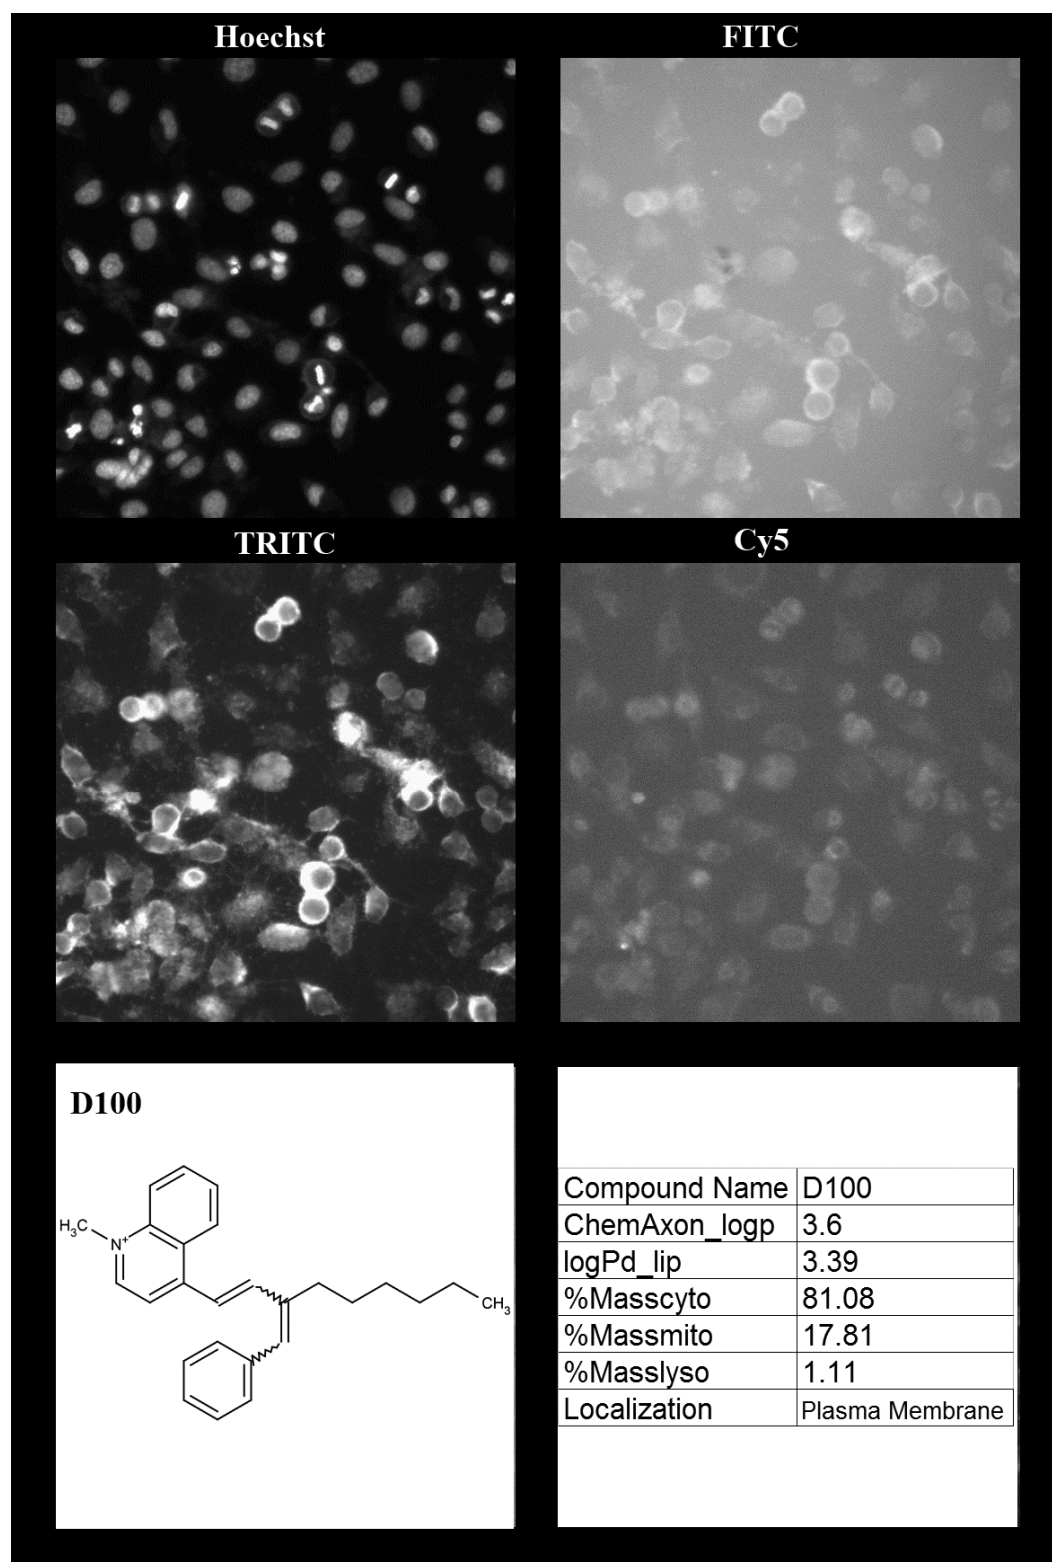

Figure S12. Compound 12 from figure 3.
